# Supplementary material for: Patient-Specific Midbrain Organoids with CRISPR Correction Reveal Disease Mechanisms and Enable Therapeutic Evaluation in Neuronopathic Gaucher Disease
Source: eLife journal article supplement (doi:10.7554/elife.109518), 2026-02-13
Supplement: fig1-data2 [file Figure 1-source data 2.pdf › Figure 1-source data 2.pdf]

**Figure 1-source data 2**  
**Figure 1E**

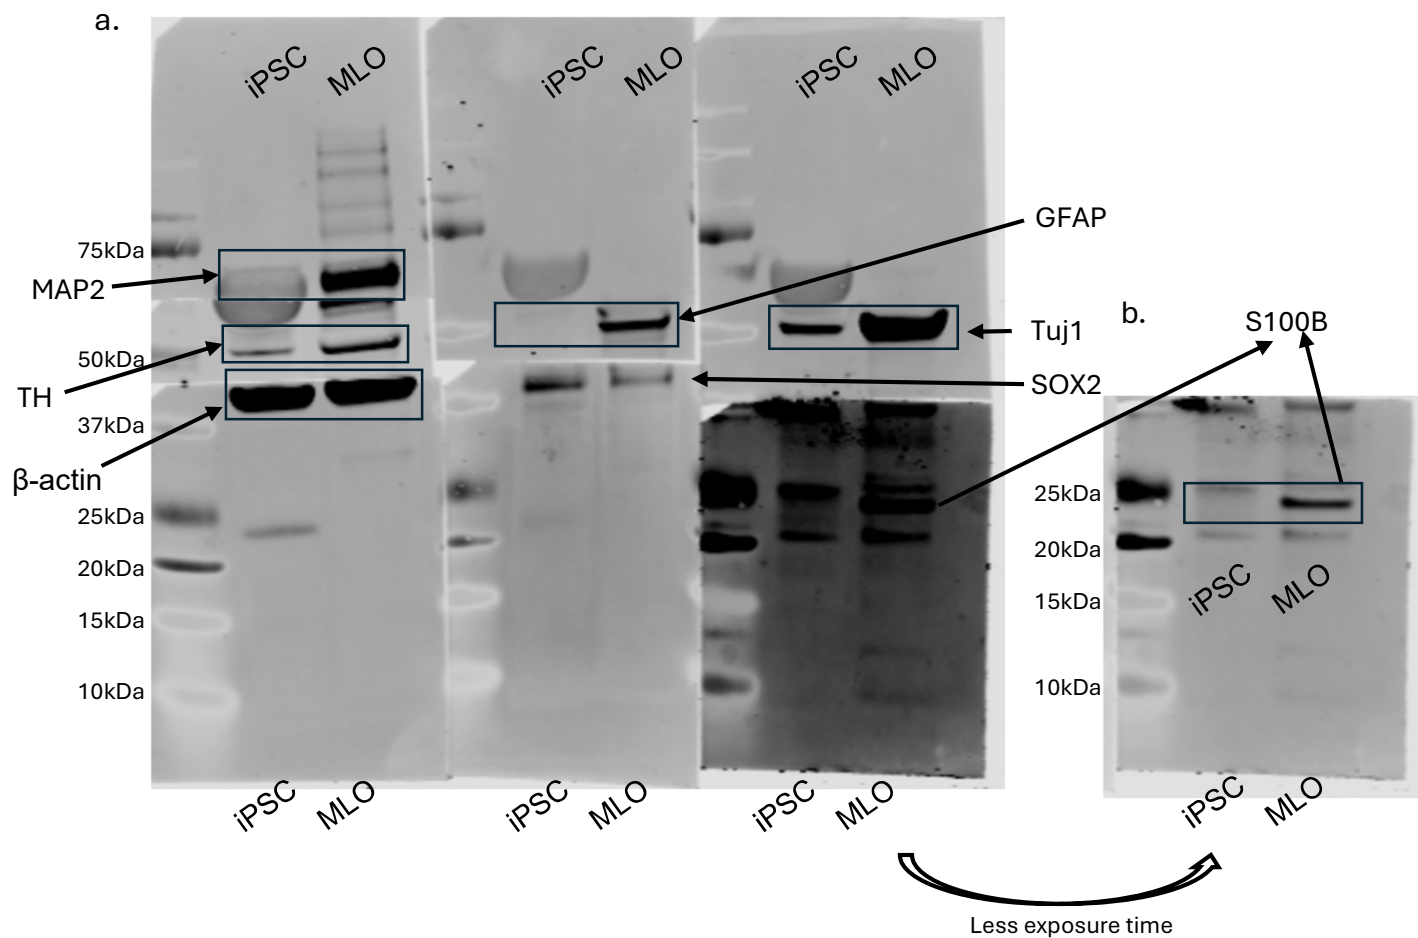

**Figure 1-Source Data 2. Original membranes corresponding to Figure 1, panel E.**

Panel a: Original blots for SOX2, Tuj1, MAP2, GFAP, S100B and β-actin. Precision Plus Protein Dual Color Standards were used. Panel b: Image with less exposure time is shown for clear S100B band used in Figure 1E.
