# Supplementary material for: Patient-Specific Midbrain Organoids with CRISPR Correction Reveal Disease Mechanisms and Enable Therapeutic Evaluation in Neuronopathic Gaucher Disease
Source: eLife journal article supplement (doi:10.7554/elife.109518), 2026-02-13
Supplement: fig2-data2 [file Figure 2-source data 2.pdf › Figure 2-source data 2.pdf]

**Figure 2-source data 2**  
**Figure 2A**

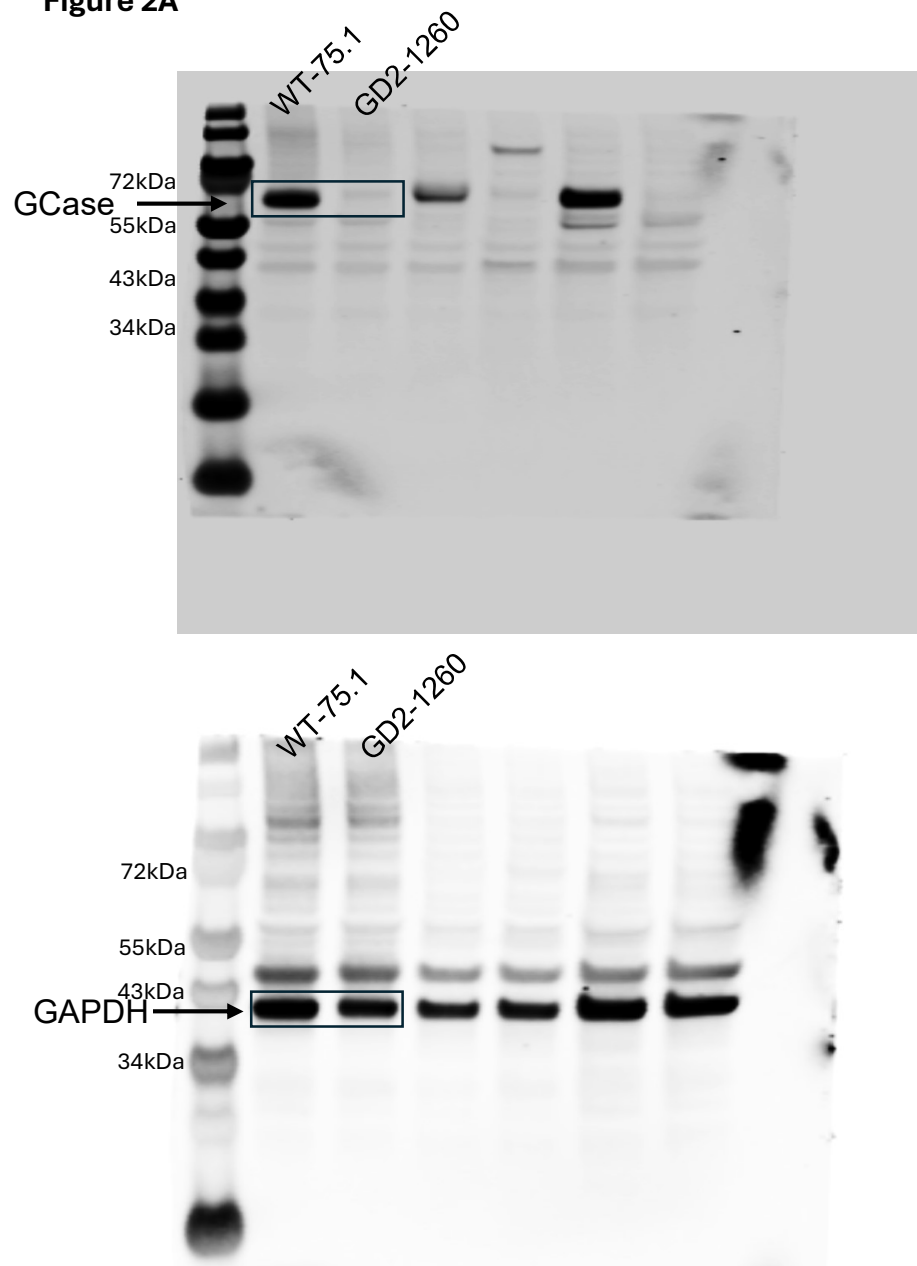

**Figure 2-source data 2. Original membranes corresponding to Figure 2, panel A.**

EZ-Run™ Prestained Rec Protein Ladder was used. The other lanes correspond to other tested samples (lanes 4-7) are not shown in Figure 2.
