# Supplementary material for: Patient-Specific Midbrain Organoids with CRISPR Correction Reveal Disease Mechanisms and Enable Therapeutic Evaluation in Neuronopathic Gaucher Disease
Source: eLife journal article supplement (doi:10.7554/elife.109518), 2026-02-13
Supplement: fig5-data2 [file Figure 5-source data 2.pdf › Figure 5-source data 2.pdf]

**Figure 5-source data 2**  
**Figure 5E**

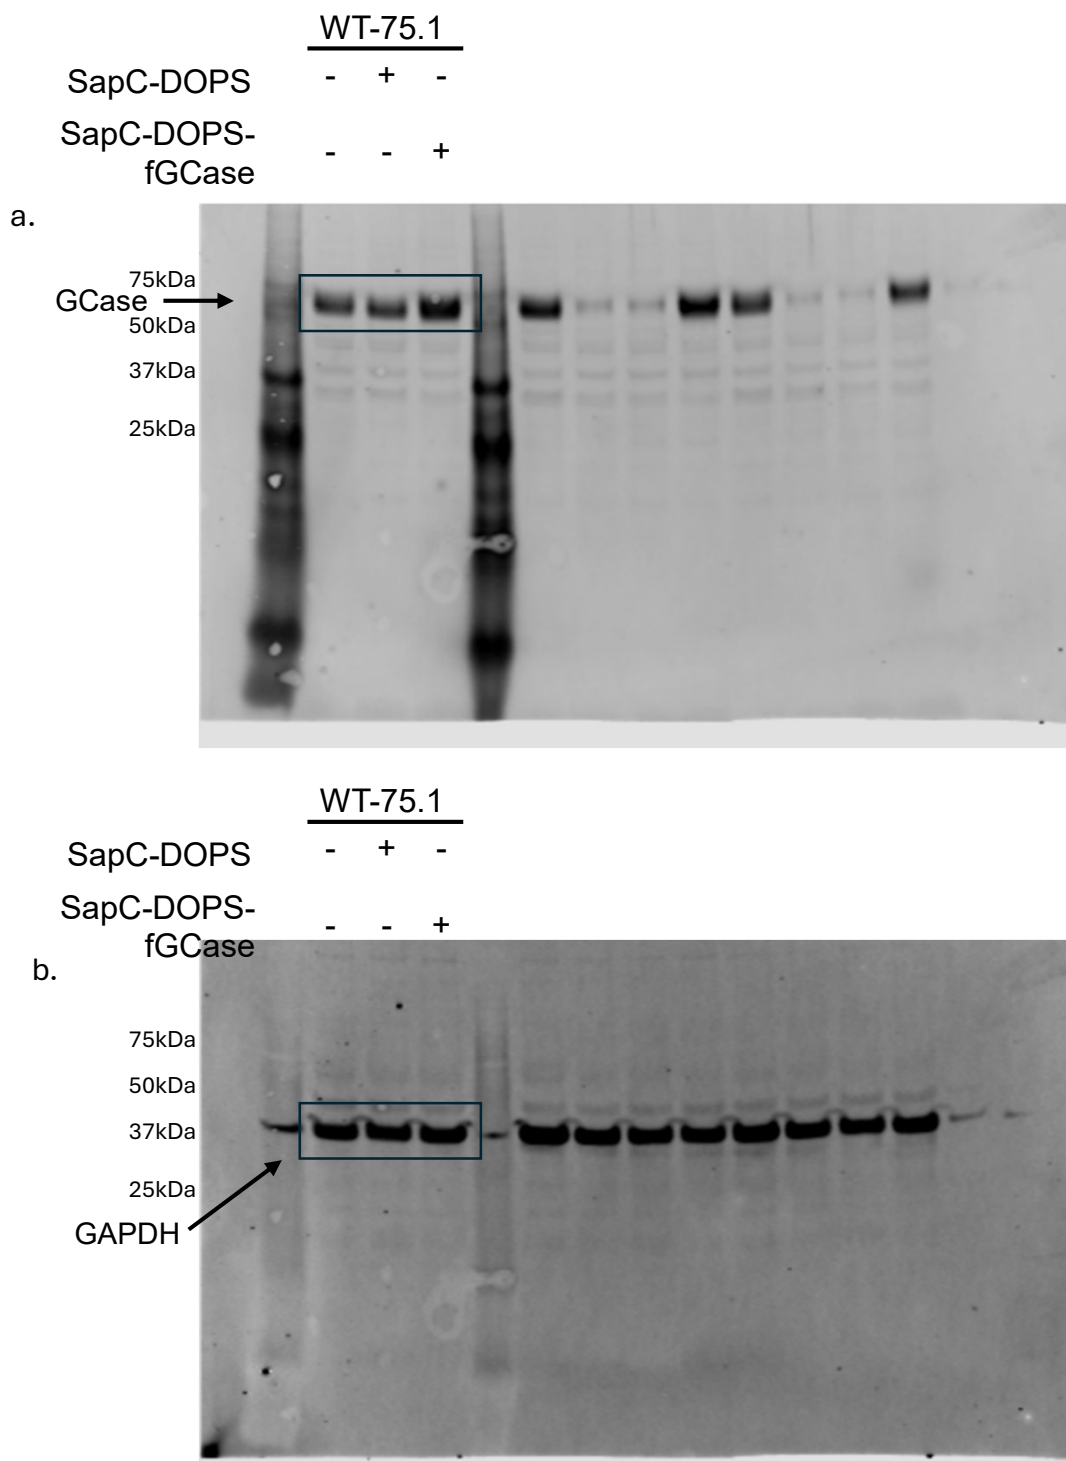

**Figure 5-Source Data 2\_5E. Original membranes corresponding to Figure 5, panel E.**  
 Original blots for Gcase (panel a) and loading control GAPDH (panel b). Precision Plus Protein Dual Color Standards were used. Other lanes are not shown in Figure 5E.

**Figure 5-source data 2**  
**Figure 5F**

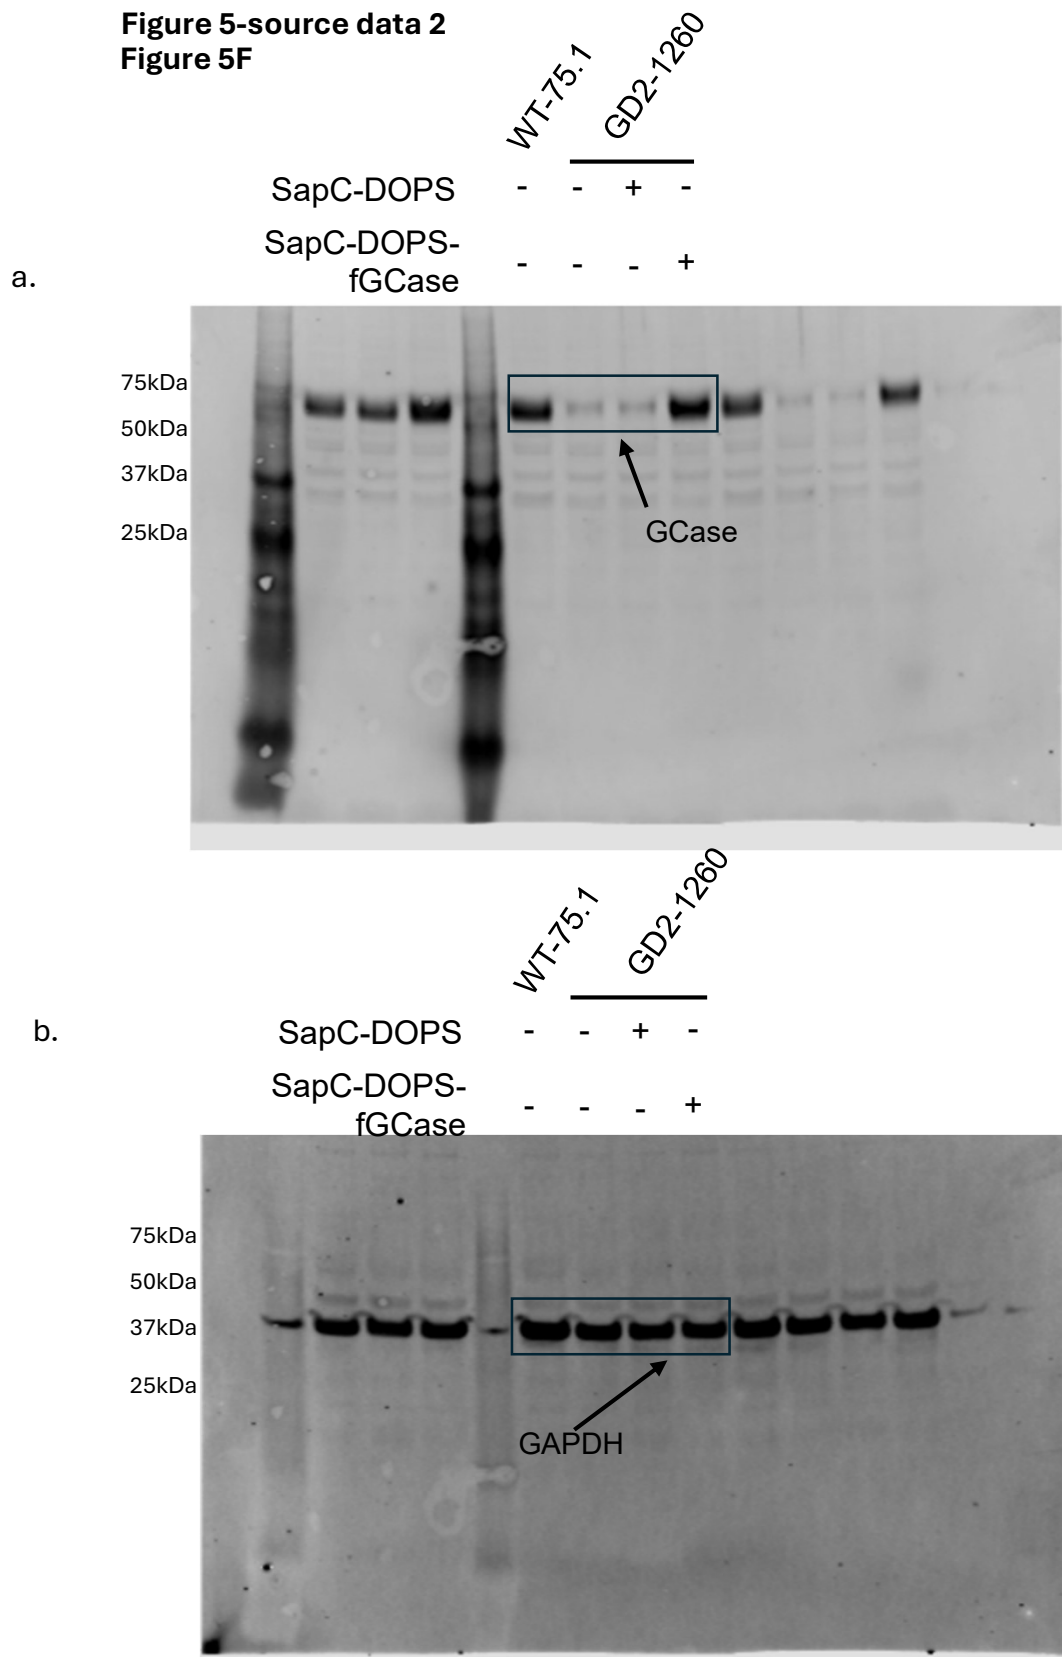

**Figure 5-Source Data 2\_5F. Original membranes corresponding to Figure 5, panel F.**  
Original blots for GCase and loading control GAPDH. Precision Plus Protein Dual Color Standards were used. Other lanes are not shown in Figure 5F.

Figure 5-source data 2  
Figure 5G

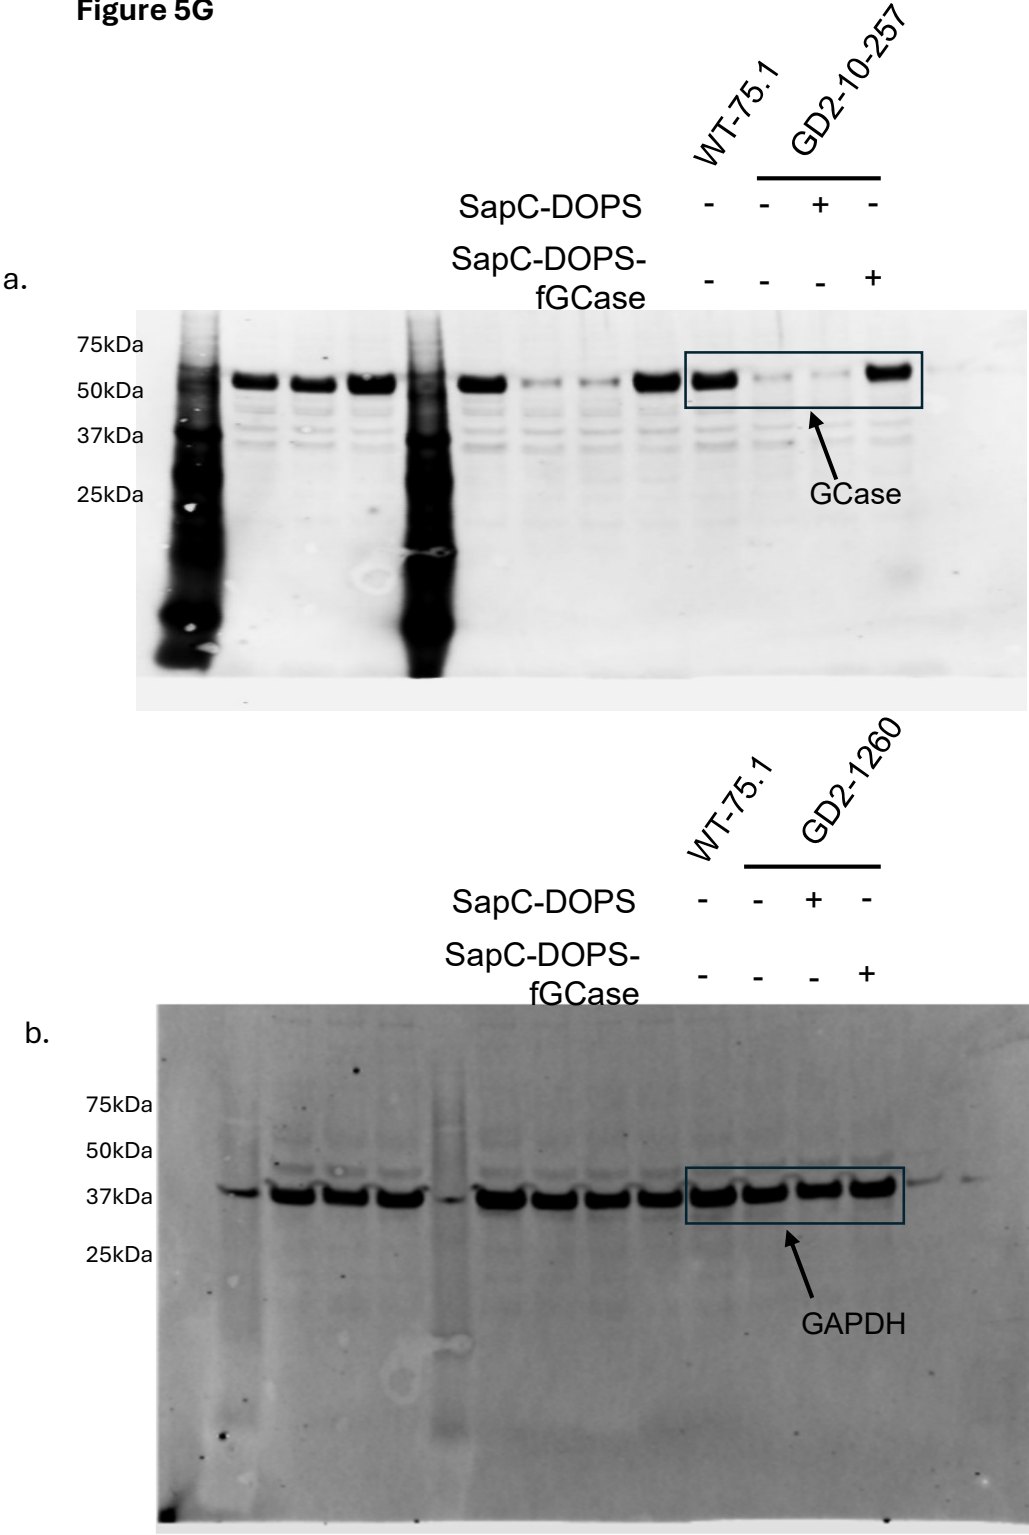

**Figure 5-Source Data 2\_5G. Original membranes corresponding to Figure 5, panel G.** Original blots for GCCase and loading control GAPDH. Precision Plus Protein Dual Color Standards were used. Other lanes are not shown in Figure 5G.

**Figure 5-source data 2**  
**Figure 5J**

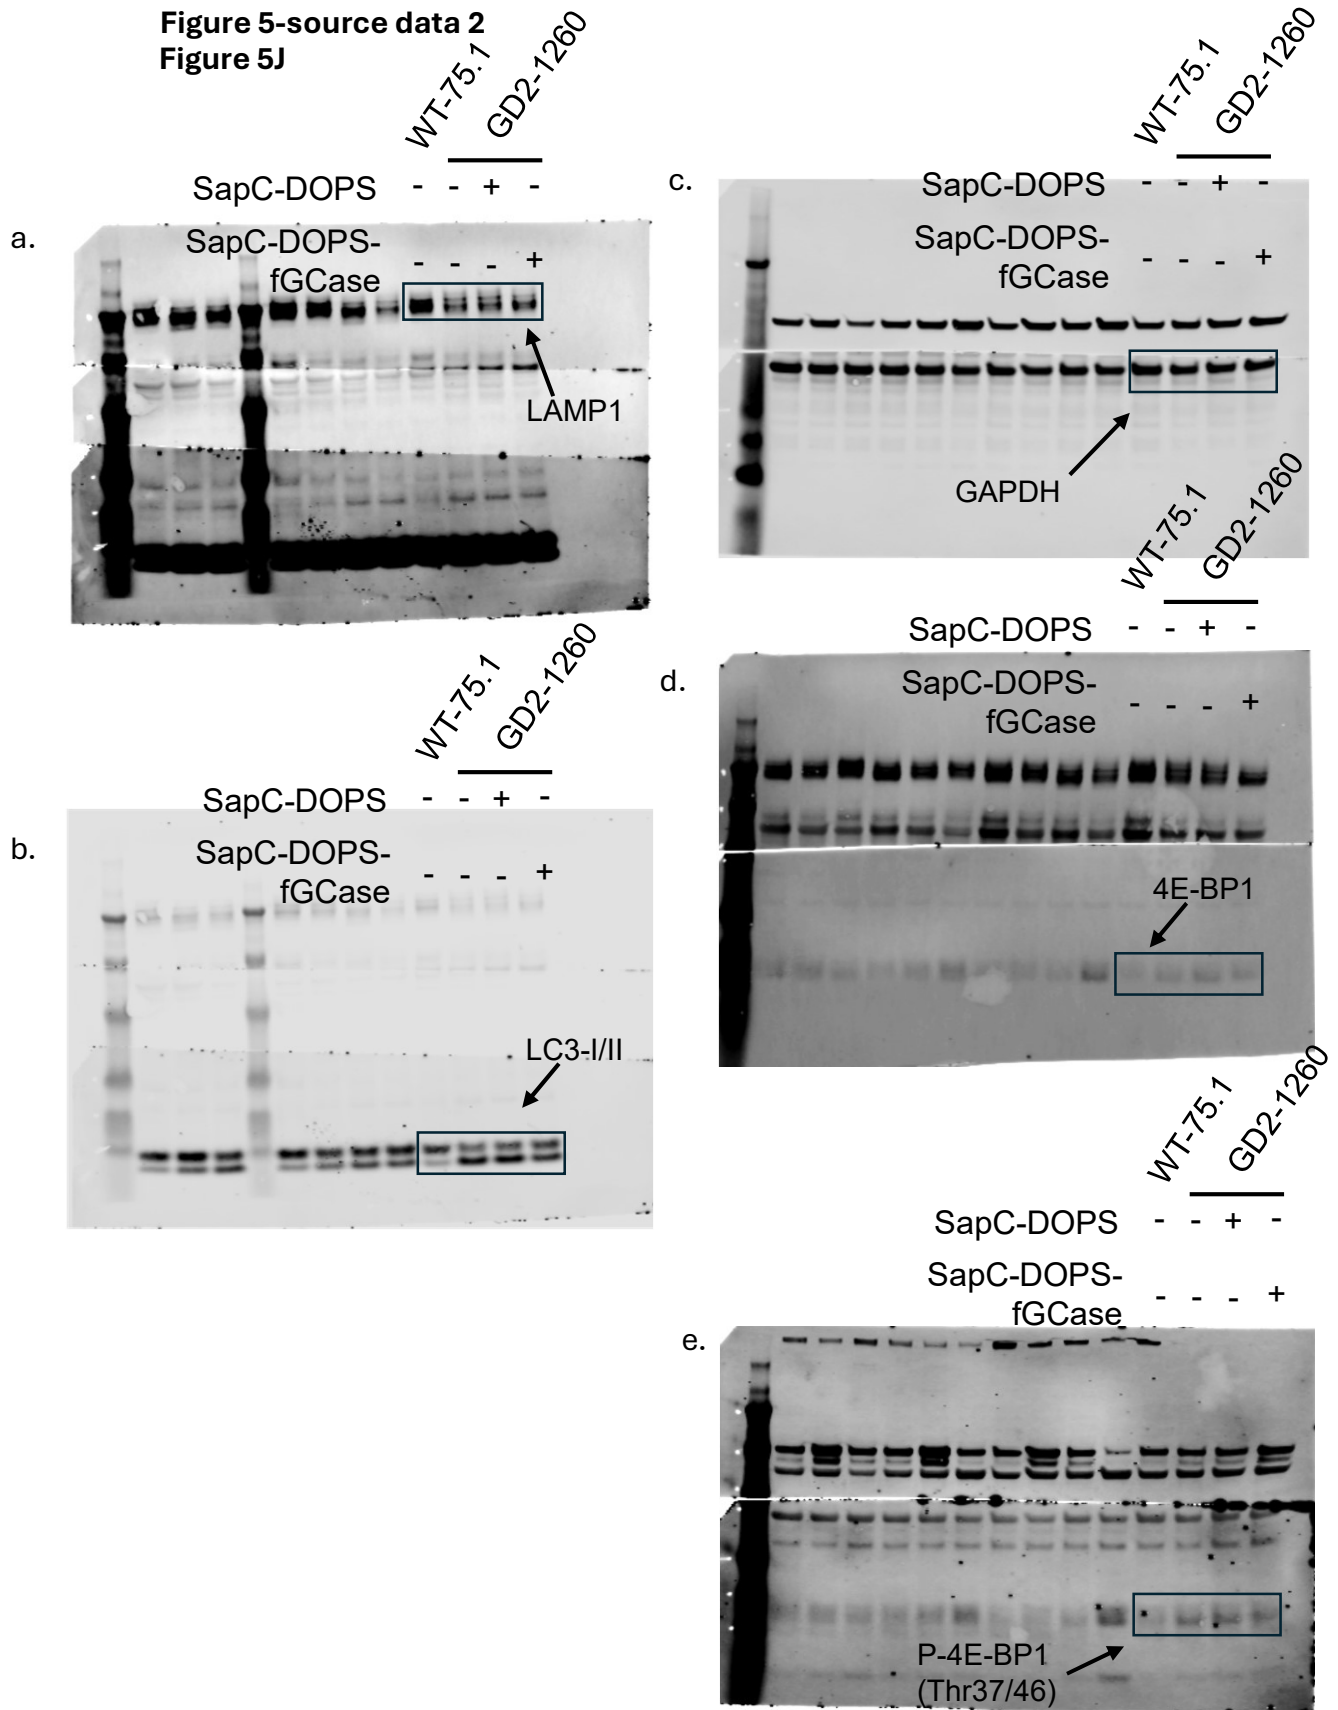

**Figure 5-Source Data 2\_5J. Original membranes corresponding to Figure 5, panel J.**  
Original blots for LAMP1 (panel a), LC3-I/II (panel b), 4E-bp1 (panel d), P-4E-BP1 (Thr37/46) (panel e), and loading control GAPDH (panel c). Precision Plus Protein Dual Color Standards were used. Other lanes and targets blotted in these membranes are not shown in Figure 5J.
