# Supplementary material for: Patient-Specific Midbrain Organoids with CRISPR Correction Reveal Disease Mechanisms and Enable Therapeutic Evaluation in Neuronopathic Gaucher Disease
Source: eLife journal article supplement (doi:10.7554/elife.109518), 2026-02-13
Supplement: fig5-figsupp1-data2 [file Figure 5-figure supplement 1-source data 2.pdf › Figure 5-figure supplement 1-source data 2.pdf]

**Figure 5-figure supplement 1-source data 2**  
**Figure 5-figure supplement 1E**

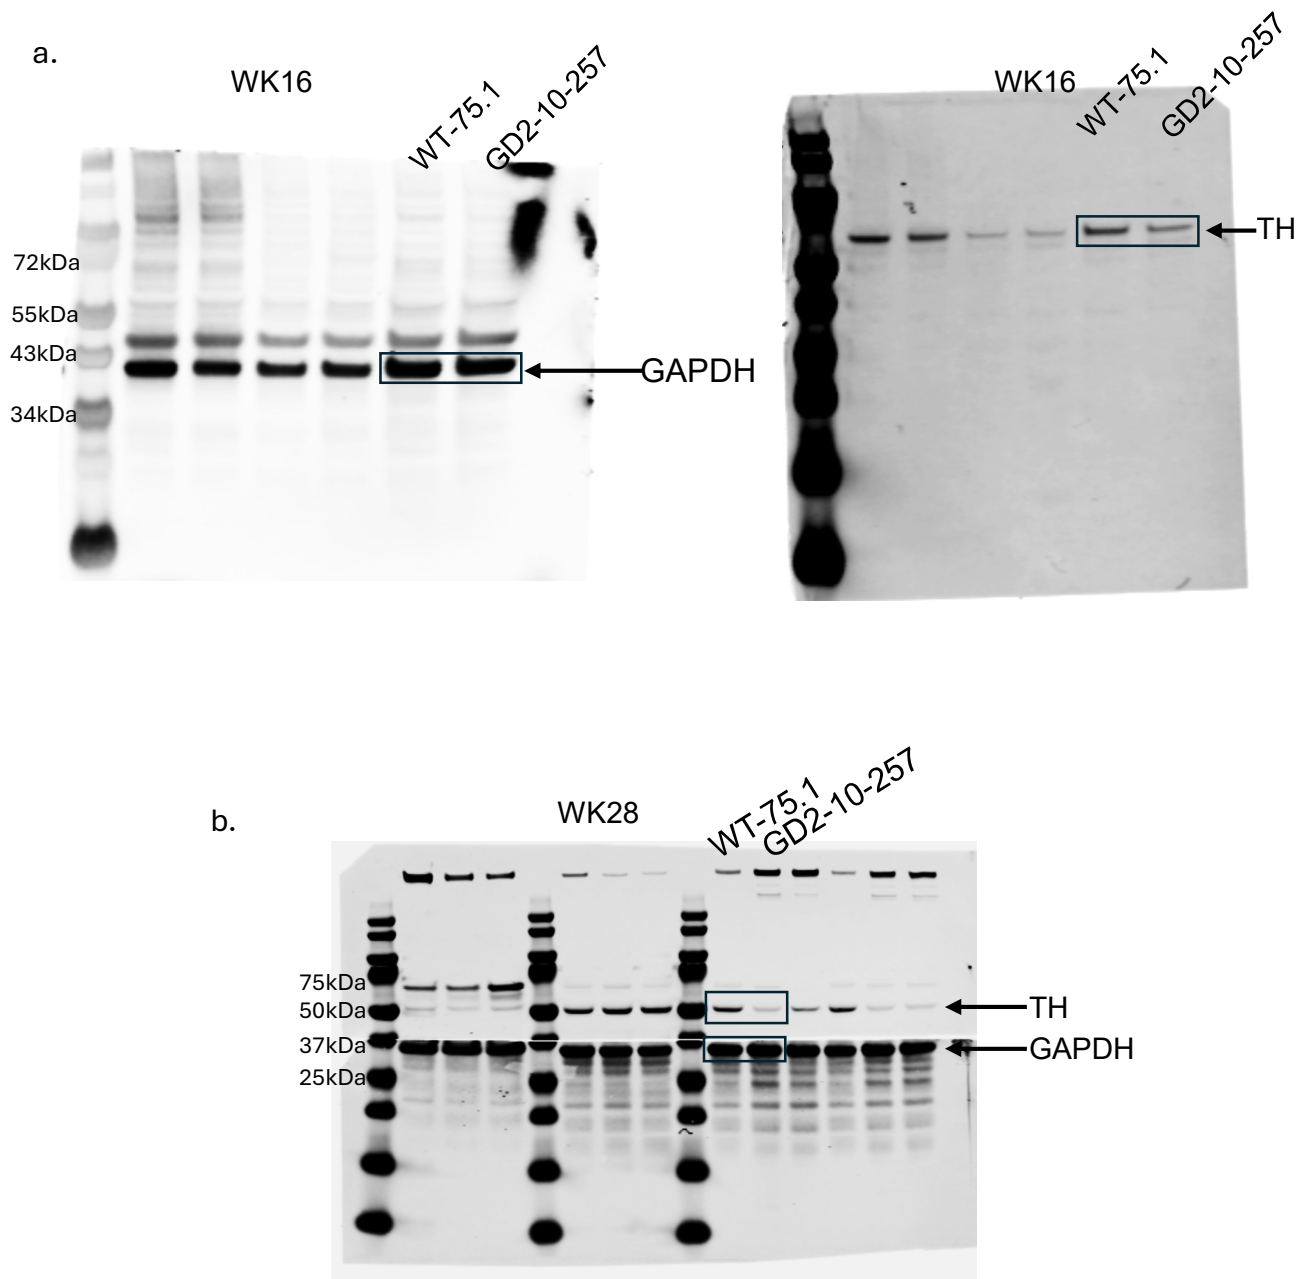

**Figure 5-figure supplement 1-source data 2. Original membranes corresponding to Figure 5-figure supplement 1, panel E.**

Original blots for TH and loading control GAPDH at WK 16 (panel a) and WK28 (panel b). Precision Plus Protein Dual Color Standards were used. Other lanes are not shown in Figure 5-figure supplement 1, panel E.
