# Supplementary material for: Patient-Specific Midbrain Organoids with CRISPR Correction Reveal Disease Mechanisms and Enable Therapeutic Evaluation in Neuronopathic Gaucher Disease
Source: eLife journal article supplement (doi:10.7554/elife.109518), 2026-02-13
Supplement: fig6-data2 [file Figure 6-source data 2.pdf › Figure 6-source data 2.pdf]

## Figure 6-source data 2

### Figure 6B

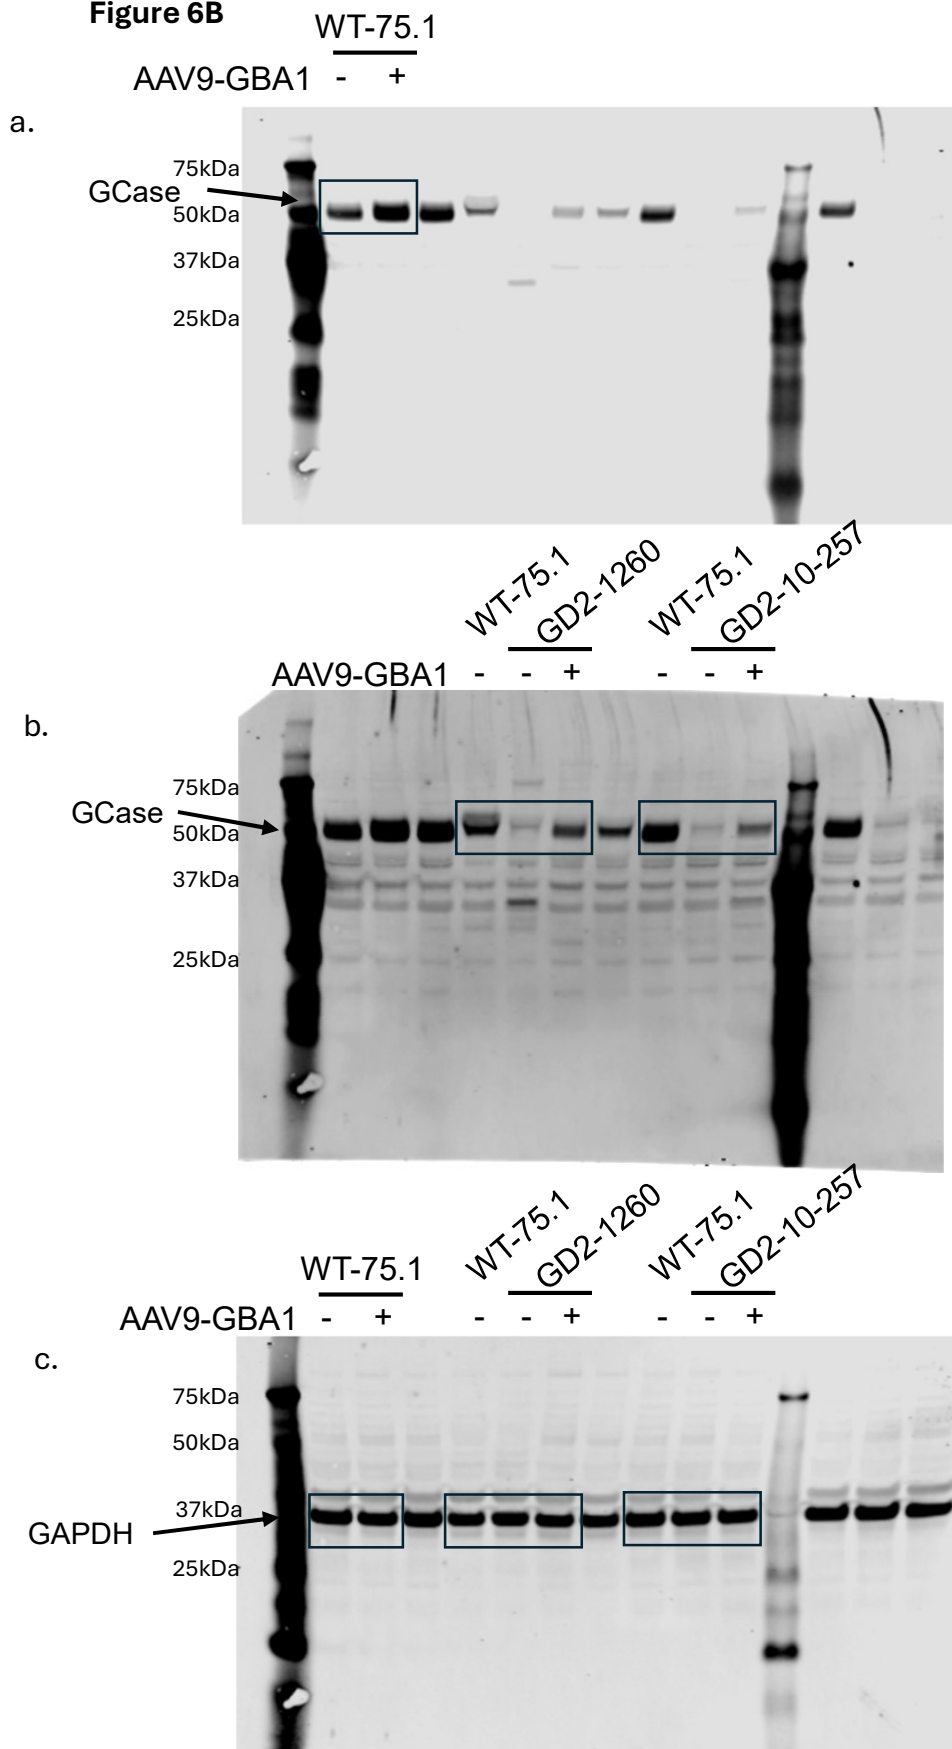

**Figure 6-Source Data 2\_6B. Original membranes corresponding to Figure 6, panel B.** Original blots for GCase (panels a and b) and loading control GAPDH (panel c). Precision Plus Protein Dual Color Standards were used. Other lanes are not shown in Figure 6B.

**Figure 6-source data 2**  
**Figure 6D**

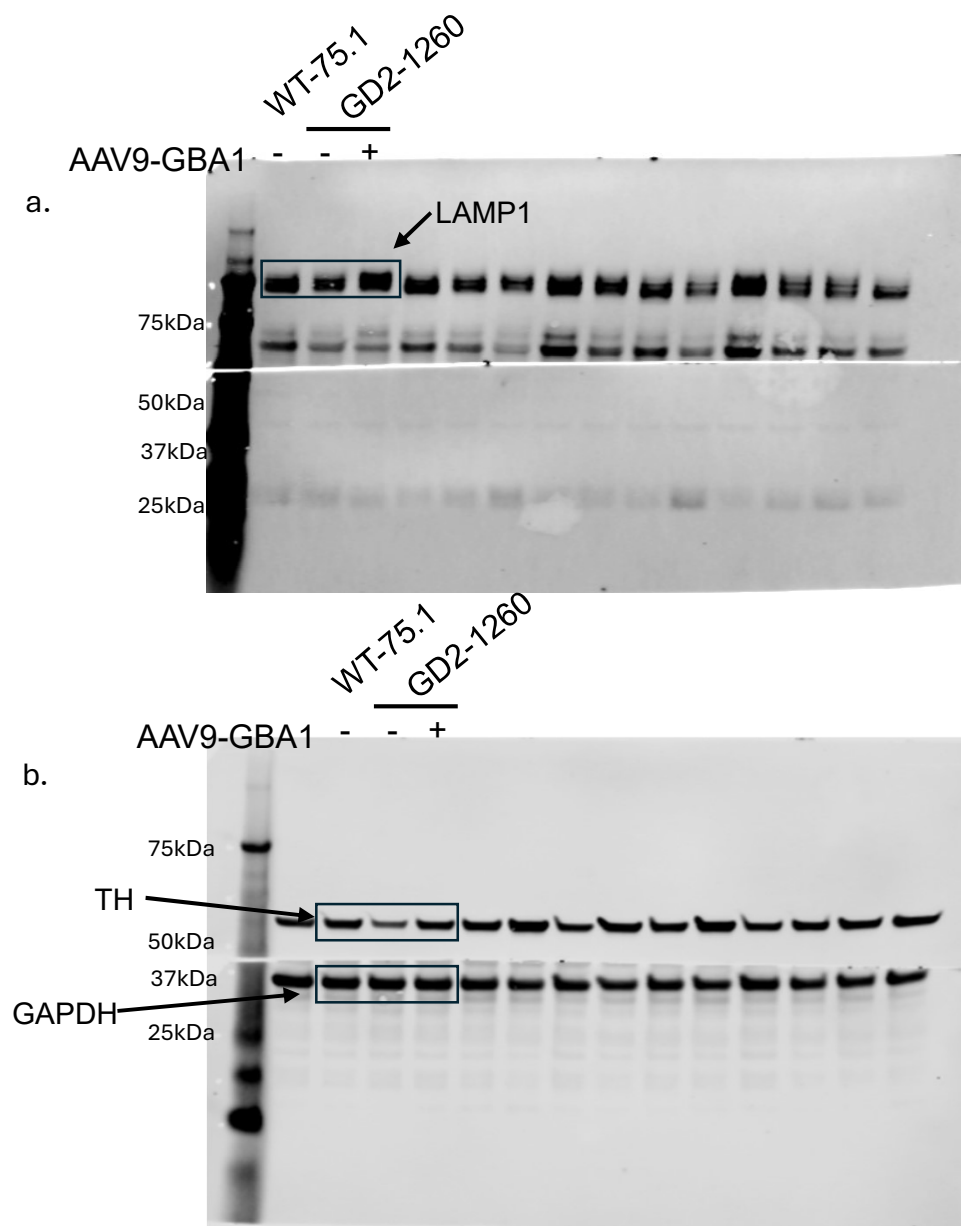

**Figure 6-Source Data 2\_6D. Original membranes corresponding to Figure 6, panel D.**  
 Original blots for LAMP1 (panel a), TH and loading control GAPDH (panel b). Precision Plus Protein Dual Color Standards were used. Other lanes are not shown in Figure 6D.
