# Supplementary material for: Patient-Specific Midbrain Organoids with CRISPR Correction Reveal Disease Mechanisms and Enable Therapeutic Evaluation in Neuronopathic Gaucher Disease
Source: eLife journal article supplement (doi:10.7554/elife.109518), 2026-02-13
Supplement: fig7-data2 [file Figure 7-source data 2.pdf › Figure 7-source data 2.pdf]

**Figure 7-source data 1**  
**Figure 7I**

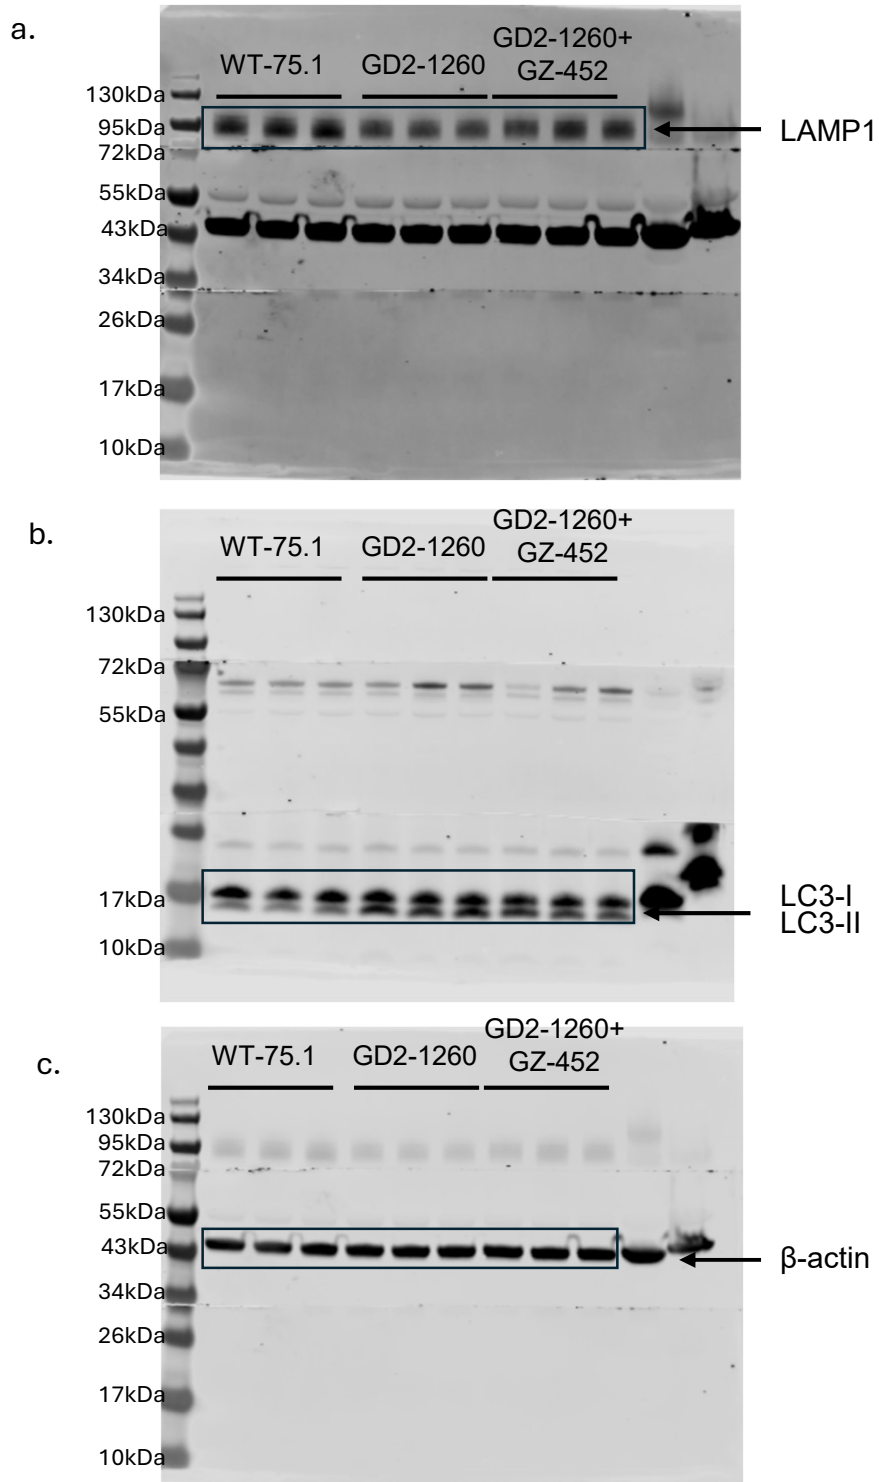

**Figure 7-Source Data 2. Original membranes corresponding to Figure 7, panel I.**  
 Original blots for Lamp1 (panel a), LC3-I/II (panel b) and loading control  $\beta$ -actin (panel c). EZ-Run™ Prestained Rec Protein Ladder were used. Other lanes are not shown in Figure 7I.
